# Supplementary material for: Characteristics of patients with atrial fibrillation prescribed edoxaban in Belgium and the Netherlands: insights from the ETNA-AF-Europe study
Source: Springer Nature journal article supplement (doi:10.1007/s12471-020-01518-7), 2021-01-07
Supplement: MOESM1 [file 18749564]

# Supplementary Information of “Characteristics of patients with atrial fibrillation prescribed edoxaban in Belgium and the Netherlands: insights from the ETNA-AF-Europe study”

## Principal Investigators of ETNA-AF-Europe

| Surname                  | Initials | Hospital                                    | City       |
|--------------------------|----------|---------------------------------------------|------------|
| Belgium                  |          |                                             |            |
| Alzand                   | B        | General Hospital Glorieux Ronse             | Ronse      |
| Asmundis, de             | C        | University Hospital Brussels                | Brussels   |
| Baetsle                  | P-E      | General Hospital Geel                       | Geel       |
| Blankoff                 | I        | Civil Hospital Marie Curie                  | Charleroi  |
| Boussy                   | T        | General Hospital Groeninge Kortrijk         | Kortrijk   |
| Buysschaert              | I        | General Hospital Aalst                      | Aalst      |
| Caenepeel <sup>a</sup>   | A        | N/A                                         | Willebroek |
| Calozet <sup>b</sup>     | Y        | N/A                                         | Gribomont  |
| Capiau <sup>b</sup>      | L        | N/A                                         | Wetteren   |
| Casado Arroyo            | R        | Hospital Erasme                             | Anderlecht |
| Catez                    | E        | Brugmann University Hospital                | Brussels   |
| Chevalier                | S        | Hospital Center Ottignies                   | Ottignies  |
| Cools                    | F        | General Hospital Klinieken Noord-Antwerpen  | Brasschaat |
| Dierickx <sup>b</sup>    | R        | N/A                                         | Westouter  |
| Dujardin                 | K        | General Hospital Delta Roeselare            | Roeselare  |
| Evrard                   | P        | MontLegia Clinic                            | Liège      |
| Faes                     | D        | Hospital Maria North-Limburg                | Overpelt   |
| Gazagnes                 | M-D      | Brugmann University Hospital                | Brussels   |
| Goethals                 | P        | Clinic Saint Jean Brussels                  | Brussels   |
| Hausman                  | P        | Grand Hopital de Charleroi Charleroi        | Gilly      |
| Heidbüchel               | H        | University Hospital Antwerpen               | Edegem     |
| Hemelsoet <sup>c</sup>   | D        | University Hospital Gent                    | Ghent      |
| Hoffer                   | E        | University Hospital Gent                    | Liège      |
| Hollanders <sup>a</sup>  | G        | N/A                                         | De Pinte   |
| Klippel, de <sup>c</sup> | N        | Hospital Jessa Hasselt                      | Hasselt    |
| Mairesse                 | GH       | Cliniques du Sud-Luxembourg                 | Arlon      |
| Mamaar                   | R        | Regional Hospital Center Huy                | Huy        |
| Man, de                  | F        | Europe Hospitals' Sainte Elisabeth Brussels | Brussels   |

|                          |      |                                                 |                        |
|--------------------------|------|-------------------------------------------------|------------------------|
| Paparella                | G    | Europe Hospitals' Sainte Elisabeth Brussels     | Brussels               |
| Pauw, de                 | M    | Ghent University Hospital                       | Ghent                  |
| Potter, de               | T    | Hospital OLVZ Aalst                             | Aalst                  |
| Put                      | P    | General Hospital Sint-Franciscus Heusden-Zolder | Heusden-Zolder         |
| Rivero                   | M    | Hospital Oost-Limburg Genk                      | Genk                   |
| Roelandt                 | R    | Hospital Jan Yperman Ieper                      | Ypres                  |
| Rossenbacker             | T    | General Hospital Imelda Bonheiden               | Bonheiden              |
| Sarens                   | T    | General Hospital Sint-Blasius Dendermonde       | Dendermonde            |
| Thoeng                   | J    | General Hospital Turnhout                       | Turnhout               |
| Vanacker <sup>c</sup>    | P    | General Hospital Groeninge                      | Kortrijk               |
| Vanassche                | T    | Leuven University Hospital                      | Leuven                 |
| Vandekerckhove           | H    | General Hospital Sint-Lucas Gent                | Ghent                  |
| Vandekerckhove           | Y    | General Hospital Sint-Jan Brugge                | Bruges                 |
| Vanstechelman            | F    | General Hospital Sint-Elisabeth Zottegem        | Zottegem               |
| Verleyen                 | D    | General Hospital Sint-Lucas Assebroek           | Bruges                 |
| Verstraete               | S    | General Hospital Zeno Knokke-Heist              | Knokke-Heist           |
| Vervoort                 | G    | General Hospital Sint-Maarten Mechelen          | Mechelen               |
| Vijgen                   | J    | Hospital Jessa Hasselt                          | Hasselt                |
| Vileyn <sup>b</sup>      | G    | N/A                                             | Blankenberge           |
| Voet                     | J    | General Hospital Nikolaas Sint-Niklaas          | Sint-Niklaas           |
| Xhaet                    | O    | UCL University Clinics of Mont-Godinne          | Yvoir                  |
| Yperzeele <sup>c d</sup> | L    | University Hospital Antwerp                     | Antwerp                |
| The Netherlands          |      |                                                 |                        |
| Alblas <sup>c</sup>      | CL   | Franciscus Vlietland                            | Schiedam               |
| Beelen                   | DPW  | IJsselland Hospital                             | Capelle aan den IJssel |
| Berg, ten                | J    | St. Antonius Hospital                           | Nieuwegein             |
| Brouwer                  | MA   | Radboud University Medical Centre               | Nijmegen               |
| Creanza                  | M    | Rivas Beatrix Hospital                          | Gorinchem              |
| Crijns                   | HJGM | Maastricht University Medical Centre+           | Maastricht             |
| Driel, van               | V    | Haga Hospital, Location Sportlaan               | The Hague              |
| Groot, de                | JR   | Amsterdam Medical Centres, Location AMC         | Amsterdam              |
| Hartog, den              | F    | Gelderse Vallei Hospital                        | Ede                    |
| Hemels                   | MEW  | Rijnstate Hospital                              | Arnhem                 |
| Hofstra                  | JH   | Queen Beatrix Hospital                          | Winterswijk            |
| Holt, ten                | W    | Amstelland Hospital                             | Amstelveen             |
| Hoogslag                 | P    | Diaconessenhuis Hospital, Location Meppel       | Meppel                 |
| Jansen                   | WPJ  | Tergooi hospital                                | Hilversum              |
| Kuijper                  | A    | Spaarne Hospital                                | Hoofddorp              |
| Nes, van                 | E    | Laurentius Hospital                             | Roermond               |
| Nierop                   | P    | Franciscus Gasthuis                             | Rotterdam              |

|                  |    |                                             |           |
|------------------|----|---------------------------------------------|-----------|
| Nooijen, van     | F  | Dijklander Hospital, Location Purmerend     | Purmerend |
| Nooijer, de      | C  | Maxima Medical Center                       | Veldhoven |
| Prins            | F  | Elkerliek Hospital, Location Helmond        | Helmond   |
| Rasoul           | S  | Zuyderland Medical Center, Location Heerlen | Heerlen   |
| Spierenburg      | H  | Franciscus Vlietland                        | Schiedam  |
| Viergever        | E  | Groene Hart Hospital                        | Gouda     |
| Wal, van de      | R  | Bernhoven Uden                              | Uden      |
| Westendorp       | I  | Rode Kruis Hospital                         | Beverwijk |
| Wetering, van de | M  | BovenIJ Hospital                            | Amsterdam |
| Wu               | KW | Van Weel-Bethesda Hospital                  | Dirksland |

---

Names are in alphabetical order. All principal investigators were affiliated with a Department of Cardiology unless stated otherwise.

*N/A* not applicable; *OLVZ* Onze Lieve Vrouweziekenhuis; *UCL* Université catholique de Louvain; *AMC* Amsterdam Medical Centre

<sup>a</sup> Private Practice in Cardiology; <sup>b</sup> General Practitioner; <sup>c</sup> Department of Neurology; <sup>d</sup> Department of Neurosurgery.
